# Supplementary material for: Structural control and functionalization of thermoresponsive nanogels: turning cross-linking points into anchoring groups
Source: Royal Society of Chemistry journal article supplement (doi:10.1039/d3py00347g), 2023-01-01
Supplement: d3py00347g1.pdf [file d3py00347g1.pdf]

## Supplementary Information

### Structural control and functionalization of thermoresponsive nanogels: turning cross-linking points into anchoring groups

Alexis Wolfel\*, Huiyi Wang, Ernesto Osorio-Blanco, Julian Bergueiro, Marcelo Ricardo Romero, Cecilia Ines Álvarez Igarzabal, Marcelo Calderón\*

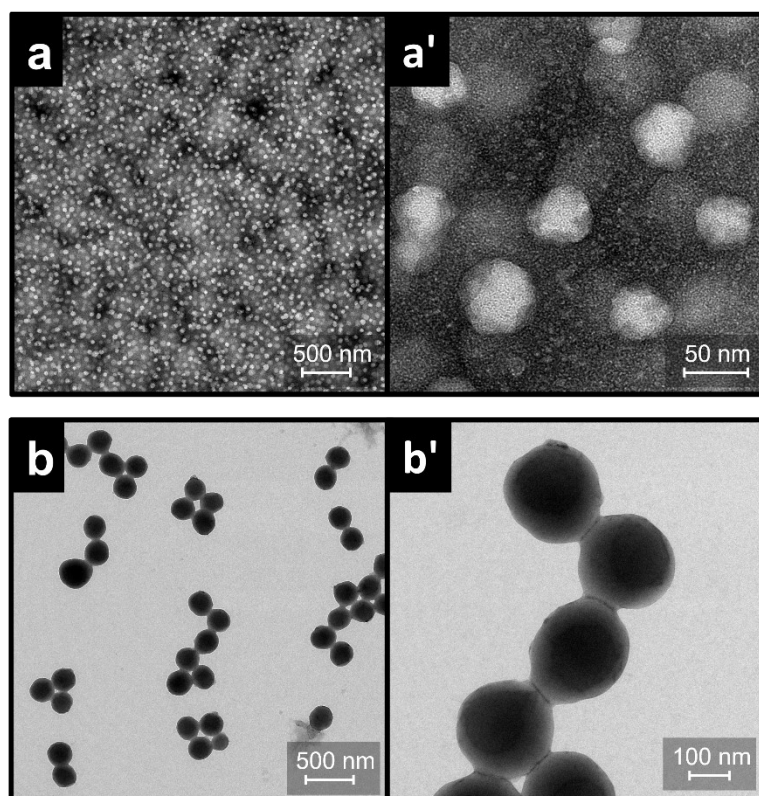

**S1** - TEM micrographs of p-NIPAm-BIS-DAT10<sub>APS</sub> before (a) and after periodate treatment (b).

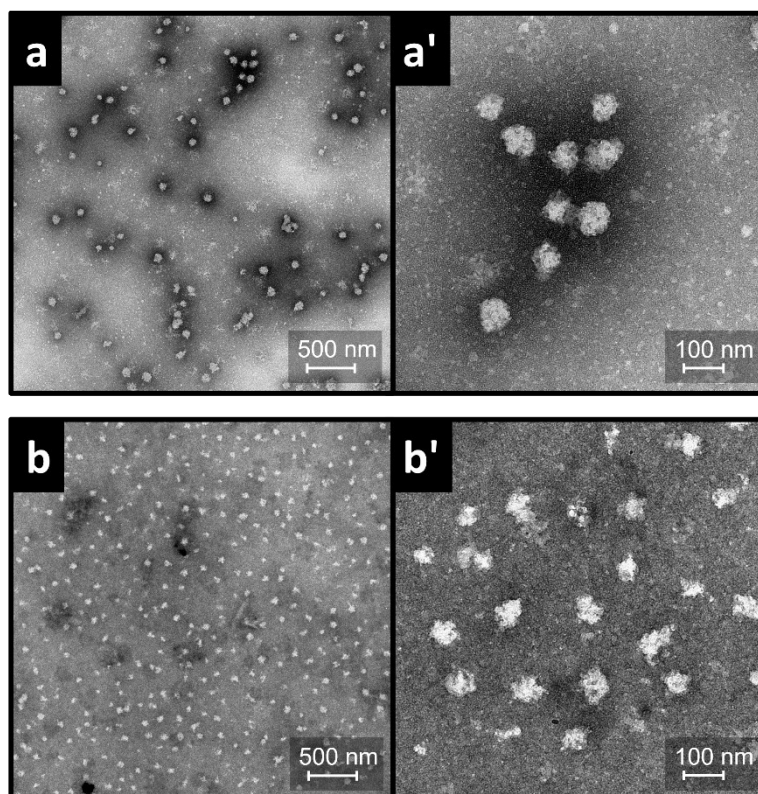

**S2** - TEM micrographs of p-NIPMAm-BIS-DAT10<sub>APS</sub> before (top) and after (bottom) the modification with periodate.

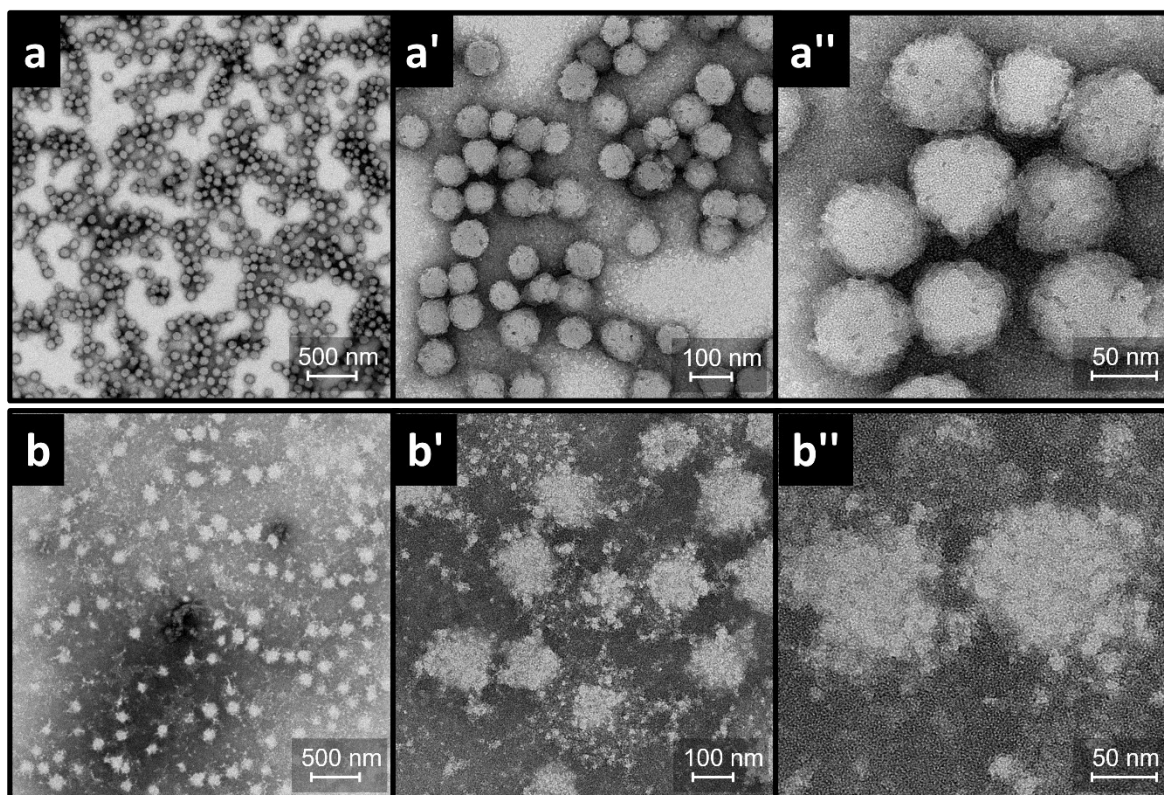

**S3** – TEM micrographs of p-NIPAm-BIS-DAT(10)<sub>APS/TEMED</sub> before (top, a, a' and a'') and after (bottom, b, b' and b'') periodate treatment.

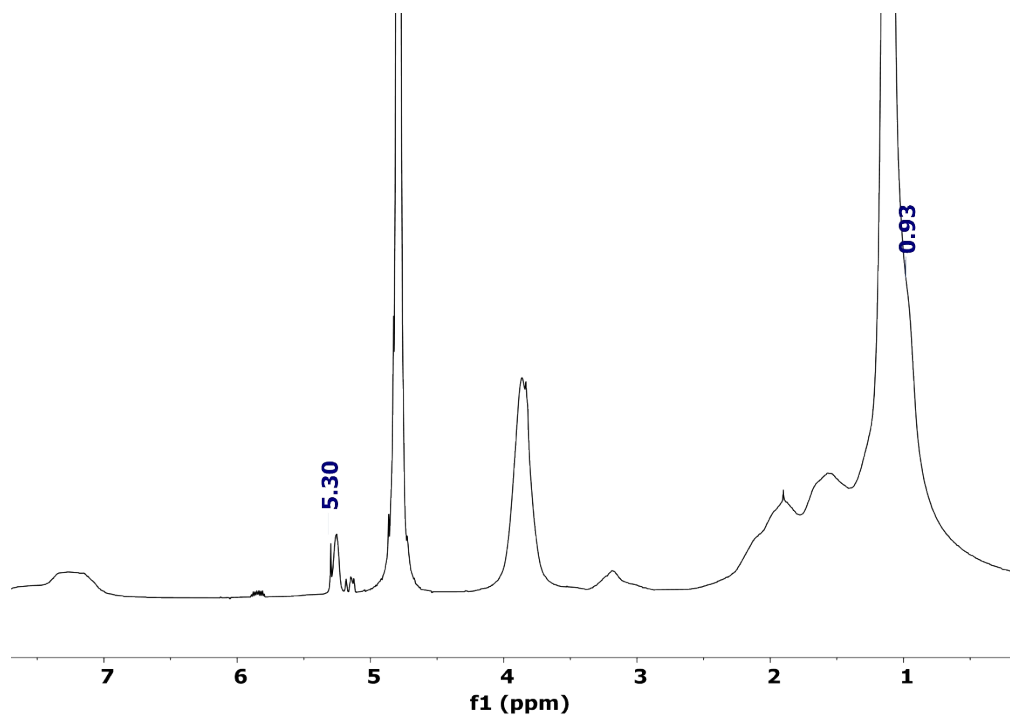

**S4** –  $^1\text{H}$ -NMR spectrum of p-NIPAm-co-NIPMAm NGs after periodate treatment. The signal at 5.30 ppm indicates the presence of  $\alpha$ -oxoaldehydes in hydrated state ( $\text{C}(\text{O})\text{-CH}(\text{OH})_2$ ). Other peaks: 7.2 ppm ( $\text{C}(\text{O})\text{-NH-}$ ; p-NIPAm, p-NIPMAm and BIS); 3.8 ppm ( $\text{-NH-CH}(\text{CH}_3)_2$ ; p-NIPAm and p-NIPMAm); 1.9 ppm ( $\text{-CH-}$ ; backbone p-NIPAm); 1.5 ppm ( $\text{-CH}_2\text{-}$ ; backbone p-NIPAm and p-NIPMAm); 1.1 ppm ( $\text{-NH-CH}(\text{CH}_3)_2$ ; p-NIPAm and p-NIPMAm); 0.9 ppm ( $\text{-CH}_3$ ; backbone p-NIPMAm).

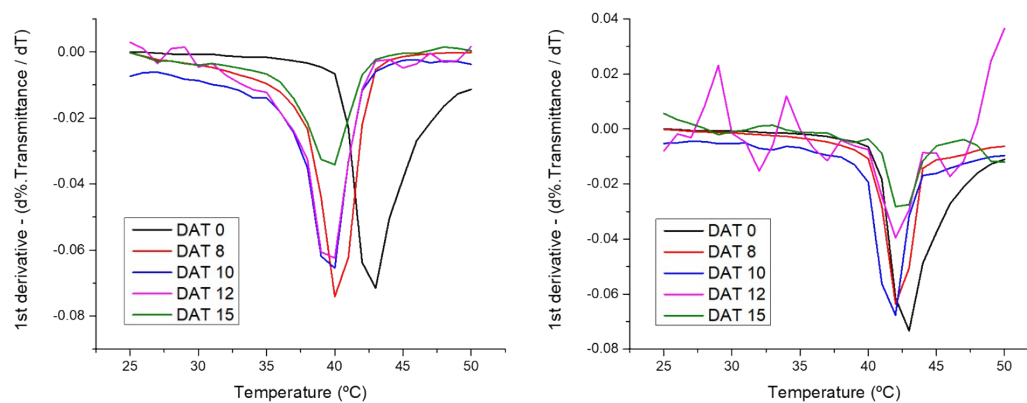

**S5** – Temperature clouding point: 1st derivative of the %Transmittance vs Temperature of p-NIPAm-co-NIPMAm-BIS-DAT<sub>APS</sub> NGs before (left) and after (right) periodate treatment.

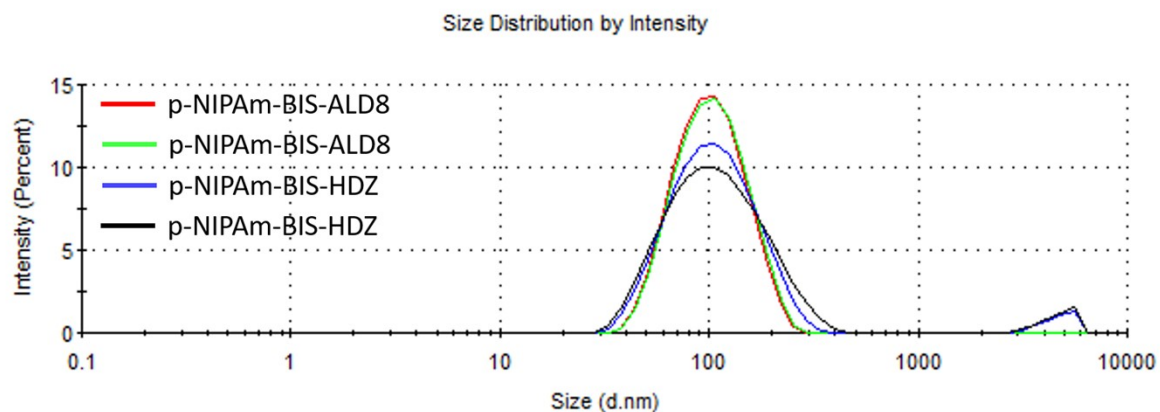

**S6**– DLS measurements for p-NIPAm-BIS-ALD (NGs after treatment with periodate) and p-NIPAm-BIS-HDZ NGs (after modification with AADH).

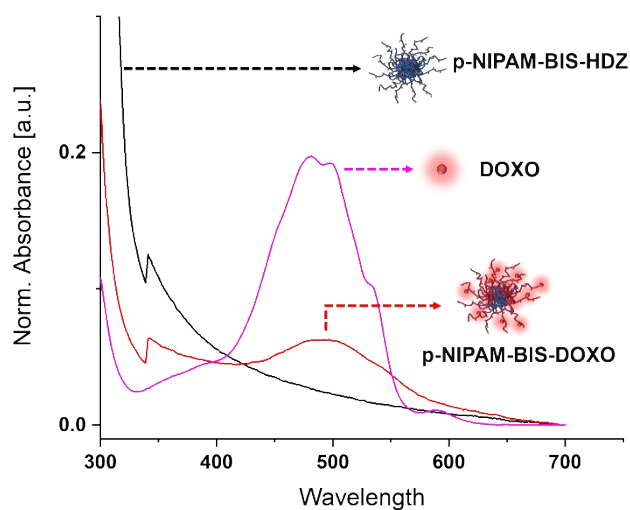

**S7** – Modification of the p-NIPAm-BIS-HDZ NGs with DOXO. UV-Vis spectrum for DOXO (pink), p-NIPAm-BIS-HDZ (black) and p-NIPAm-BIS-DOXO (red).

| Sample         | NBD (Control) | NBD-HDZ |
|----------------|---------------|---------|
| μg DOXO/mg NGs | 11.27         | 3.25    |

**S8** – Loading capacity of DOXO in NGs.
